# Supplementary material for: Integrative Genomic Analysis Predicts Regulatory Role of N6-Methyladenosine-Associated SNPs for Adiposity
Source: Front Cell Dev Biol. 2020 Jul 7;8:551. doi: 10.3389/fcell.2020.00551 (PMC7358408; doi:10.3389/fcell.2020.00551)
Supplement: TABLE S1 — The identified 230 BMI-associated m6A-SNPs (p < 5.0E-05). [file Table_1.xlsx]

## Sheet: Supplymentary Table 1
Variant	Chromosome	Position	Gene	Gene type	Mutation type	Promoter histone marks	Enhancer histone marks	DNAse	Proteins bound	Motifs changed	eQTL hits	m6A function	Confidence level	m6A ID	GSE88837	GSE109597	GSE70353	p.value
rs3734264	chr6	34831866	UHRF1BP1	protein_coding	synonymous		5 tissues	HRT		T3R	65 hits	Functional Gain	Prediction:(Low)	m6A_ID_191736		0.540294	0.00183	1.689e-49
rs180744	chr16	28508048	APOBR	protein_coding	synonymous	GI	8 tissues	PLCNT,MUS		HNF4,RXRA	168 hits	Functional Loss	Prediction:(Low)	m6A_ID_294670		0.0188831		7.549e-41
rs8024	chr1	201845575	IPO9	protein_coding	3'-UTR		SKIN, LNG	SKIN,CRVX	CTCF,SMC3,RAD21		10 hits	Functional Loss	miCLIP:(High)	m6A_ID_1153	0.00614	0.189119	0.00235	7.097e-39
rs7250850	chr19	47585517	ZC3H4	protein_coding	synonymous		ESC, IPSC, SKIN	BLD		GLI,LUN-1	1 hit	Functional Gain	Prediction:(Low)	m6A_ID_332226		0.291565	0.00543	4.505e-35
rs4077410	chr16	29998200	TAOK2	protein_coding	synonymous		SKIN			4 altered motifs	73 hits	Functional Loss	MeRIP-Seq:(Medium)	m6A_ID_42399	0.0241	0.0930917	0.0169	1.707e-25
rs1046080	chr6	31595882	PRRC2A	protein_coding	missense			BLD,SKIN	POL2,POL2B	NRSF,RFX5,Sin3Ak-20	38 hits	Functional Loss	miCLIP:(High)	m6A_ID_13969		0.017968		1.072e-21
rs151390	chr4	103183510	SLC39A8	protein_coding	3'-UTR			BRN,BRN,THYM		Bcl6b,STAT	1 hit	Functional Gain	Prediction:(Low)	m6A_ID_173459	0.00207	0.062139	0.0708	3.001e-21
rs76078428	chr2	25044740	CENPO	protein_coding	3'-UTR	ESC	6 tissues	ESC,PLCNT	POL2	AP-1,Pax-6	3 hits	Functional Gain	Prediction:(Low)	m6A_ID_136896				5.547e-20
rs2979247	chr8	8888948	ERI1	protein_coding	3'-UTR					6 altered motifs	21 hits	Functional Loss	Prediction:(Low)	m6A_ID_212943		0.580722	0.000177	1.51e-19
rs1731259	chr2	26953582	KCNK3	protein_coding	3'-UTR		10 tissues	ADRL		4 altered motifs	4 hits	Functional Loss	Prediction:(Low)	m6A_ID_137179	0.00568	0.205597	0.155	4.386e-19
rs1731260	chr2	26953354	KCNK3	protein_coding	3'-UTR		9 tissues	LNG		CACD,PLAG1,UF1H3BETA	5 hits	Functional Loss	Prediction:(Low)	m6A_ID_137178	0.00568			7.869e-19
rs72634820	chr1	1597020	SLC35E2B	protein_coding	3'-UTR		BLD, PANC				144 hits	Functional Loss	miCLIP:(High)	m6A_ID_601065				3.001e-18
rs9460	chr15	73044575	ADPGK	protein_coding	3'-UTR	BLD	7 tissues	7 tissues		5 altered motifs	1 hit	Functional Loss	miCLIP:(High)	m6A_ID_14394	0.0225	0.00708315	0.00438	7.678e-18
rs7535528	chr1	2444414	PANK4	protein_coding	missense		SKIN			6 altered motifs	13 hits	Functional Gain	Prediction:(Low)	m6A_ID_111678		0.535526	0.0026	1.575e-17
rs12033257	chr1	112318484	KCND3	protein_coding	3'-UTR		4 tissues	HRT		SIX5,Znf143	4 hits	Functional Gain	Prediction:(Low)	m6A_ID_122614	0.0482	0.0113103	0.317	4.994e-17
rs715	chr2	211543055	CPS1	protein_coding	3'-UTR					RXRA		Functional Loss	Prediction:(Low)	m6A_ID_151015		0.206836	0.0338	1.337e-16
rs1933437	chr13	28624294	FLT3	protein_coding	missense	4 tissues	7 tissues	BLD,PANC,BLD		GR,Zfp410	4 hits	Functional Gain	Prediction:(Low)	m6A_ID_268945		0.449321	0.0712	2.359e-16
rs6962772	chr7	99081730	ZNF789	protein_coding	missense		SKIN, HRT	MUS,MUS			14 hits	Functional Loss	Prediction:(Low)	m6A_ID_206533		0.00357953	3.01e-05	2.303e-15
rs3738476	chr1	151006539	PRUNE	protein_coding	synonymous		4 tissues		MAFK		13 hits	Functional Loss	Prediction:(Low)	m6A_ID_124301			0.137	3.345e-14
rs3738476	chr1	151006539	PRUNE	protein_coding	synonymous		4 tissues		MAFK		13 hits	Functional Loss	Prediction:(Low)	m6A_ID_124299				3.345e-14
rs10799790	chr1	23418153	LUZP1	protein_coding	missense					T3R	2 hits	Functional Loss	MeRIP-Seq:(Medium)	m6A_ID_33788		0.254571	0.0528	5.14e-14
rs3751855	chr16	31091209	ZNF646	protein_coding	synonymous		7 tissues	BLD,OVRY			107 hits	Functional Loss	MeRIP-Seq:(Medium)	m6A_ID_42658		0.317827	0.242	2.072e-13
rs3751855	chr16	31091209	ZNF646	protein_coding	synonymous		7 tissues	BLD,OVRY			107 hits	Functional Loss	MeRIP-Seq:(Medium)	m6A_ID_42657				2.072e-13
rs1043470	chr16	69737908	NFAT5	protein_coding	3'-UTR			6 tissues		Sox	4 hits	Functional Gain	Prediction:(Low)	m6A_ID_298119				2.302e-13
rs10903311	chr8	8643387	MFHAS1	protein_coding	3'-UTR			THYM		Mef2,Pou3f2	12 hits	Functional Loss	MeRIP-Seq:(Medium)	m6A_ID_77698		0.705626	1.55e-10	3.264e-13
rs11555142	chr7	99032593	PTCD1	protein_coding	synonymous	CRVX	ESDR			Pax-4	13 hits	Functional Gain	Prediction:(Low)	m6A_ID_206518				4.603e-13
rs11555142	chr7	99032593	PTCD1	protein_coding	synonymous	CRVX	ESDR			Pax-4	13 hits	Functional Gain	Prediction:(Low)	m6A_ID_206517				4.603e-13
rs10832778	chr11	17394073	NCR3LG1	protein_coding	3'-UTR						26 hits	Functional Gain	Prediction:(Low)	m6A_ID_244519		0.0948631		5.733e-13
rs785467	chr1	46521559	PIK3R3	protein_coding	missense						16 hits	Functional Loss	Prediction:(Low)	m6A_ID_118496		0.458913	0.000391	1.786e-12
rs2230742	chr16	4016676	ADCY9	protein_coding	synonymous			BLD,LIV		Pax-5,STAT,Tgif1		Functional Gain	Prediction:(Low)	m6A_ID_292100	0.0117	0.0238478	0.000753	2.125e-12
rs2481676	chr1	62627675	INADL	protein_coding	3'-UTR					Pax-2,Pbx-1		Functional Loss	Prediction:(Low)	m6A_ID_119678			0.00111	4.064e-12
rs12463	chr13	99105302	STK24	protein_coding	3'-UTR		8 tissues	9 tissues		7 altered motifs	5 hits	Functional Loss	Prediction:(Low)	m6A_ID_271582		0.0138023	6.2e-11	6.018e-12
rs878436	chr1	155224985	FAM189B	protein_coding	5'-UTR	24 tissues	BLD, BRN	11 tissues	AP2ALPHA,AP2GAMMA,ZNF263	Znf143		Functional Loss	MeRIP-Seq:(Medium)	m6A_ID_28680	0.00643	0.00195484	0.554	6.842e-12
rs35679149	chr6	43604167	MAD2L1BP	protein_coding	synonymous	24 tissues		21 tissues		Nkx2		Functional Loss	MeRIP-Seq:(Medium)	m6A_ID_72221		0.0561289	0.000347	6.885e-12
rs35679149	chr6	43604167	MAD2L1BP	protein_coding	synonymous	24 tissues		21 tissues		Nkx2		Functional Loss	MeRIP-Seq:(Medium)	m6A_ID_72222				6.885e-12
rs724416	chr1	173904809	RC3H1	protein_coding	3'-UTR		ESC			5 altered motifs	44 hits	Functional Gain	Prediction:(Low)	m6A_ID_128801		0.33968	0.238	8.689e-12
rs11542009	chr3	9517369	SETD5	protein_coding	missense						10 hits	Functional Gain	Prediction:(Low)	m6A_ID_154512		0.0266112	1.8e-05	1.241e-11
rs11542009	chr3	9517369	SETD5	protein_coding	missense						10 hits	Functional Gain	Prediction:(Low)	m6A_ID_154511				1.241e-11
rs1134767	chr1	62456014	INADL	protein_coding	missense					4 altered motifs		Functional Loss	Prediction:(Low)	m6A_ID_119647			0.00111	1.552e-11
rs1140681	chr12	54651471	CBX5	protein_coding	5'-UTR	4 tissues	16 tissues	PLCNT,BLD		5 altered motifs		Functional Loss	MeRIP-Seq:(Medium)	m6A_ID_34670	0.00961	0.0572	0.12	2.376e-11
rs4758686	chr12	122623000	MLXIP	protein_coding			8 tissues	MUS,LNG		GR,NRSF	3 hits	Functional Loss	Prediction:(Low)	m6A_ID_266879	0.0429	0.00745134	2.63e-11	3.053e-11
rs4758686	chr12	122623000	MLXIP	protein_coding			8 tissues	MUS,LNG		GR,NRSF	3 hits	Functional Loss	Prediction:(Low)	m6A_ID_266878				3.053e-11
rs62399870	chr6	34249341	NUDT3	protein_coding			BLD, HRT	BLD		5 altered motifs	4 hits	Functional Gain	Prediction:(Low)	m6A_ID_191679				9.353e-11
rs35901559	chr16	29829642	AC009133.12	antisense		4 tissues	15 tissues	8 tissues		GR,SETDB1,Sin3Ak-20	22 hits	Functional Loss	MeRIP-Seq:(Medium)	m6A_ID_42348				1.075e-10
rs200866239	chr16	4920320	UBN1	protein_coding	missense		8 tissues	GI		GR,Maf		Functional Gain	Prediction:(Low)	m6A_ID_292366		0.240074	0.778	1.568e-10
rs12936083	chr17	4801887	CHRNE	protein_coding	3'-UTR	7 tissues	12 tissues	10 tissues		9 altered motifs	19 hits	Functional Gain	Prediction:(Low)	m6A_ID_302187			0.347	2.779e-10
rs6995692	chr8	10587004	CTD-2135J3.3	antisense		18 tissues	8 tissues	14 tissues		AP-1,CTCF,HNF4	17 hits	Functional Gain	Prediction:(Low)	m6A_ID_213165				3.427e-10
rs2255493	chr5	153432970	MFAP3	protein_coding	synonymous					4 altered motifs	3 hits	Functional Loss	MeRIP-Seq:(Medium)	m6A_ID_68479	0.0334	0.254479	0.312	5.333e-10
rs2255493	chr5	153432970	MFAP3	protein_coding	synonymous					4 altered motifs	3 hits	Functional Loss	MeRIP-Seq:(Medium)	m6A_ID_68480				5.333e-10
rs62053191	chr16	72993706	ZFHX3	protein_coding	synonymous		IPSC			NRSF		Functional Loss	MeRIP-Seq:(Medium)	m6A_ID_43955		0.115157	3.2e-06	5.828e-10
rs4625783	chr17	80086395	CCDC57	protein_coding	missense	THYM	5 tissues	THYM		Rad21	38 hits	Functional Gain	Prediction:(Low)	m6A_ID_315268		0.0495579	0.196	5.991e-10
rs10935969	chr3	153742411	ARHGEF26-AS1	processed_transcript						Foxa,YY1	12 hits	Functional Loss	MeRIP-Seq:(Medium)	m6A_ID_63400				8.599e-10
rs11724758	chr4	120239878	FABP2	protein_coding	3'-UTR	GI	SKIN			7 altered motifs	26 hits	Functional Loss	Prediction:(Low)	m6A_ID_174357		0.61958	0.595	1.037e-09
rs60351949	chr2	55198661	EML6	protein_coding	3'-UTR		BRN, HRT, MUS			PLZF	11 hits	Functional Loss	Prediction:(Low)	m6A_ID_139424		0.00614528	0.255	1.296e-09
rs2178004	chr15	41991315	MGA	protein_coding	missense		6 tissues	BRST		SIX5	3 hits	Functional Loss	Prediction:(Low)	m6A_ID_282634		0.391196	0.102	1.938e-09
rs853678	chr6	28297313	ZSCAN31	protein_coding	missense				ZNF263	RFX5,SMC3	59 hits	Functional Loss	MeRIP-Seq:(Medium)	m6A_ID_71136				2.002e-09
rs853678	chr6	28297313	ZSCAN31	protein_coding	missense				ZNF263	RFX5,SMC3	59 hits	Functional Loss	MeRIP-Seq:(Medium)	m6A_ID_71137				2.002e-09
rs2244625	chr11	64026144	PLCB3	protein_coding	synonymous			OVRY,BLD,SKIN		4 altered motifs	25 hits	Functional Loss	Prediction:(Low)	m6A_ID_248441			0.277	2.184e-09
rs7253519	chr19	1986520	BTBD2	protein_coding	missense		PLCNT	HRT,OVRY			15 hits	Functional Loss	MeRIP-Seq:(Medium)	m6A_ID_51225		0.191134	0.173	2.445e-09
rs7253519	chr19	1986520	BTBD2	protein_coding	missense		PLCNT	HRT,OVRY			15 hits	Functional Loss	MeRIP-Seq:(Medium)	m6A_ID_51224		0.191134		2.445e-09
rs150139842	chr17	79985284	LRRC45	protein_coding	missense		IPSC, BLD, MUS	BLD,THYM		6 altered motifs		Functional Loss	MeRIP-Seq:(Medium)	m6A_ID_48459		0.0741655	0.556	3.067e-09
rs34804482	chr11	27389739	LGR4	protein_coding	missense	PANC	BRST, GI, PANC	MUS,GI	GATA2,P300			Functional Loss	MeRIP-Seq:(Medium)	m6A_ID_27757	0.00864	0.00320188	0.000233	3.593e-09
rs2030259	chr2	86683642	KDM3A	protein_coding	missense					Irf,Myb	2 hits	Functional Gain	Prediction:(Low)	m6A_ID_141452		0.325021	0.0394	3.665e-09
rs8096662	chr18	42533130	SETBP1	protein_coding	synonymous		BRN					Functional Gain	Prediction:(Low)	m6A_ID_317472		0.285657	4.04e-05	4.138e-09
rs3750944	chr11	6239344	FAM160A2	protein_coding	missense		ESDR	ESDR		ATF3	1 hit	Functional Gain	Prediction:(Low)	m6A_ID_243284		0.75714	0.404	4.741e-09
rs4715227	chr6	51491884	PKHD1	protein_coding	missense		FAT					Functional Gain	Prediction:(Low)	m6A_ID_193838		0.392242	0.308	6.101e-09
rs1136948	chr16	3721773	TRAP1	protein_coding	missense			IPSC,IPSC,MUS		4 altered motifs	46 hits	Functional Loss	MeRIP-Seq:(Medium)	m6A_ID_42880	0.0146	0.566624	0.000982	8.66e-09
rs7975791	chr12	49413486	KMT2D	protein_coding	3'-UTR	11 tissues	21 tissues	30 tissues	POL2	Smad3		Functional Gain	Prediction:(Low)	m6A_ID_260151				9.02e-09
rs10250	chr19	4101062	MAP2K2	protein_coding	synonymous					Smad	1 hit	Functional Gain	Prediction:(Low)	m6A_ID_321003		0.0757289	0.00111	1.074e-08
rs34931	chr5	111310129	NREP-AS1	antisense			8 tissues	LNG,BRN		Bsx,Myb,Sox		Functional Loss	Prediction:(Low)	m6A_ID_182329				1.306e-08
rs7185940	chr16	20410488	PDILT	protein_coding	synonymous	GI	LIV	IPSC,GI,LIV				Functional Loss	Prediction:(Low)	m6A_ID_293642		0.503591	0.333	1.444e-08
rs9657518	chr8	10467589	RP1L1	protein_coding	missense		BLD			4 altered motifs	1 hit	Functional Gain	Prediction:(Low)	m6A_ID_213067		0.673853	0.662	1.566e-08
rs961098	chr5	74400386	ANKRD31	protein_coding	missense			LNG	CTCF	CEBPB,Foxp1	3 hits	Functional Loss	Prediction:(Low)	m6A_ID_180490		0.921021		1.684e-08
rs6953642	chr7	5540769	FBXL18	protein_coding	synonymous		IPSC, SKIN	SKIN		NRSF,Rad21	5 hits	Functional Loss	MeRIP-Seq:(Medium)	m6A_ID_74738		0.162843	0.000393	1.845e-08
rs1048365	chr7	100804430	AP1S1	protein_coding	3'-UTR			6 tissues		7 altered motifs	19 hits	Functional Gain	Prediction:(Low)	m6A_ID_207306		0.662112	0.242	2.222e-08
rs35011845	chr12	133435716	CHFR	protein_coding	synonymous		IPSC, THYM, GI	BRN,MUS	CMYC	CTCF,Hand1,YY1	30 hits	Functional Loss	Prediction:(Low)	m6A_ID_268186	0.0286	0.522049	0.00388	2.322e-08
rs2289747	chr2	55198385	EML6	protein_coding	3'-UTR		4 tissues			Ets,Foxp1	21 hits	Functional Loss	Prediction:(Low)	m6A_ID_139423		0.00614528	0.255	2.404e-08
rs6910549	chr6	25780811	SLC17A4	protein_coding	3'-UTR		ESDR, IPSC				20 hits	Functional Loss	Prediction:(Low)	m6A_ID_189525		0.49247	0.228	2.426e-08
rs2294532	chr1	6694927	DNAJC11	protein_coding	3'-UTR		7 tissues	20 tissues	8 bound proteins	GR,NRSF,T3R	3 hits	Functional Loss	MeRIP-Seq:(Medium)	m6A_ID_43693				2.717e-08
rs62491373	chr7	139785651	KDM7A	protein_coding	3'-UTR		BLD	BLD	KAP1	5 altered motifs	6 hits	Functional Loss	Prediction:(Low)	m6A_ID_210140				3.064e-08
rs1050115	chr2	136511817	UBXN4	protein_coding	synonymous					Foxa,HP1-site-factor,STAT	22 hits	Functional Loss	Prediction:(Low)	m6A_ID_144680		0.105294	0.0165	3.09e-08
rs2269828	chr12	47471439	AMIGO2	protein_coding	synonymous	7 tissues	12 tissues	5 tissues	POL2	E2F		Functional Loss	MeRIP-Seq:(Medium)	m6A_ID_34222		0.139	0.183	3.981e-08
rs17787930	chr11	46958299	C11orf49	protein_coding	5'-UTR	24 tissues		53 tissues	52 bound proteins	KAP1,Roaz	10 hits	Functional Gain	Prediction:(Low)	m6A_ID_246235		0.123049	2.02e-06	4.179e-08
rs1151539	chr11	66031660	KLC2	protein_coding	synonymous		IPSC, SKIN	OVRY		AIRE,VDR	1 hit	Functional Loss	MeRIP-Seq:(Medium)	m6A_ID_30271		0.525872	0.221	4.264e-08
rs1061508	chr1	184662181	EDEM3	protein_coding	3'-UTR			BRN,LNG	GR	4 altered motifs	28 hits	Functional Loss	Prediction:(Low)	m6A_ID_130003		0.12249	0.00906	5.844e-08
rs2074912	chr5	140870516	PCDHGC5	protein_coding	missense	BRN	8 tissues			4 altered motifs	2 hits	Functional Loss	MeRIP-Seq:(Medium)	m6A_ID_68195		0.587204	0.862	7.579e-08
rs1885986	chr17	2203175	SMG6	protein_coding	missense		4 tissues	IPSC		CTCF	45 hits	Functional Loss	MeRIP-Seq:(Medium)	m6A_ID_45341		0.233143	0.11	7.61e-08
rs1043011	chr12	56865040	GLS2	protein_coding	3'-UTR			MUS	POL2,POL24H8	HNF4	11 hits	Functional Loss	Prediction:(Low)	m6A_ID_262022	0.02	0.4979	0.155	8.597e-08
rs4233729	chr2	29092679	TRMT61B	protein_coding	synonymous	24 tissues		16 tissues	ZNF263	EBF,Gfi1,NF-kappaB	58 hits	Functional Loss	miCLIP:(High)	m6A_ID_601471		0.0972795	0.026	1.016e-07
rs2266692	chr5	86708640	CCNH	protein_coding	5'-UTR	24 tissues		53 tissues	22 bound proteins			Functional Loss	Prediction:(Low)	m6A_ID_181559		0.117482	9.38e-13	1.17e-07
rs7304559	chr12	110289501	GLTP	protein_coding	3'-UTR					GLI	21 hits	Functional Loss	Prediction:(Low)	m6A_ID_265531		0.34334	0.00327	1.236e-07
rs14346	chr11	1011829	AP2A2	protein_coding	3'-UTR		MUS, PANC, SPLN			BHLHE40,NRSF		Functional Loss	MeRIP-Seq:(Medium)	m6A_ID_26426		0.0414846	0.105	1.389e-07
rs4970714	chr1	92941357	GFI1	protein_coding	3'-UTR		IPSC, ESC, BLD	THYM		AP-1	18 hits	Functional Loss	MeRIP-Seq:(Medium)	m6A_ID_51499		0.963521	0.353	1.515e-07
rs72681869	chr14	50655357	SOS2	protein_coding	missense							Functional Gain	Prediction:(Low)	m6A_ID_274930		0.114741	1.95e-05	1.599e-07
rs1128416	chr2	29001691	PPP1CB	protein_coding	missense		6 tissues				57 hits	Functional Gain	Prediction:(Low)	m6A_ID_137669		0.119595	1.1e-06	1.603e-07
rs3738702	chr1	115601528	TSPAN2	protein_coding	synonymous		GI, KID			HNF1	1 hit	Functional Loss	Prediction:(Low)	m6A_ID_122983		0.734178	5.53e-08	1.717e-07
rs3738702	chr1	115601528	TSPAN2	protein_coding	synonymous		GI, KID			HNF1	1 hit	Functional Loss	Prediction:(Low)	m6A_ID_122984			0.195	1.717e-07
rs4712960	chr6	25727265	HIST1H2BA	protein_coding	synonymous					6 altered motifs	23 hits	Functional Loss	Prediction:(Low)	m6A_ID_189512		0.52885		1.762e-07
rs7284476	chr22	38129332	TRIOBP	protein_coding	synonymous	LIV	7 tissues	GI,GI,LIV		Zfx	16 hits	Functional Loss	Prediction:(Low)	m6A_ID_348785				1.818e-07
rs2070489	chr3	38519424	ACVR2B	protein_coding	synonymous		IPSC			TFIIA	8 hits	Functional Loss	MeRIP-Seq:(Medium)	m6A_ID_64125		0.326668	4.28e-06	1.82e-07
rs17851657	chr19	4102449	MAP2K2	protein_coding	synonymous		IPSC, BLD, SKIN			Ets,YY1		Functional Loss	MeRIP-Seq:(Medium)	m6A_ID_52323		0.0757289	0.00111	1.854e-07
rs3735440	chr7	21551070	SP4	protein_coding	3'-UTR					DBP,Maf	4 hits	Functional Loss	MeRIP-Seq:(Medium)	m6A_ID_74111		0.0764831	0.0426	3.162e-07
rs7212573	chr17	42254281	ASB16	protein_coding	missense		5 tissues	LIV,BLD		Myc,YY1	35 hits	Functional Loss	MeRIP-Seq:(Medium)	m6A_ID_46381		0.0518055	0.0399	3.233e-07
rs5213	chr11	17408404	KCNJ11	protein_coding	3'-UTR		10 tissues	43 tissues	9 bound proteins	4 altered motifs	16 hits	Functional Loss	MeRIP-Seq:(Medium)	m6A_ID_27449		0.156682	0.0438	3.82e-07
rs7217858	chr17	42254527	ASB16	protein_coding	missense		4 tissues	BLD		CTCF,Rad21	33 hits	Functional Loss	Prediction:(Low)	m6A_ID_309023		0.0518055	0.0399	4.055e-07
rs6796910	chr3	9431656	SETD5-AS1	antisense			BLD, LNG, SKIN			ZBRK1	12 hits	Functional Loss	Prediction:(Low)	m6A_ID_154486				4.096e-07
rs876934	chr12	122354848	PSMD9	protein_coding	3'-UTR		8 tissues	37 tissues	CTCF,RAD21	6 altered motifs	6 hits	Functional Gain	Prediction:(Low)	m6A_ID_266834		0.899732	8.66e-11	4.437e-07
rs10277447	chr7	99006763	BUD31	protein_coding	5'-UTR			53 tissues	7 bound proteins	4 altered motifs	4 hits	Functional Loss	Prediction:(Low)	m6A_ID_206497		0.0156469	0.122	6.312e-07
rs4570925	chr17	53471191	MMD	protein_coding	3'-UTR		LIV, MUS			9 altered motifs	7 hits	Functional Loss	Prediction:(Low)	m6A_ID_310586	0.0427	0.0119982	0.00136	7.054e-07
rs6874309	chr5	77774498	SCAMP1	protein_coding	3'-UTR		PANC			Hdx	2 hits	Functional Gain	Prediction:(Low)	m6A_ID_180724		0.032428	2.3e-11	7.465e-07
rs1058587	chr19	18499422	GDF15	protein_coding	missense			52 tissues	34 bound proteins		1 hit	Functional Loss	PA-m6A-Seq:(High)	m6A_ID_700612		0.0100544	0.000192	7.534e-07
rs1058587	chr19	18499422	GDF15	protein_coding	missense			52 tissues	34 bound proteins			Functional Gain	Prediction:(Low)	m6A_ID_326687				7.534e-07
rs522063	chr15	41476209	EXD1	protein_coding	missense		11 tissues	4 tissues		5 altered motifs	45 hits	Functional Loss	Prediction:(Low)	m6A_ID_282504		0.993473	0.383	8.416e-07
rs13111	chr20	30922399	KIF3B	protein_coding	3'-UTR	BLD	14 tissues	7 tissues	4 bound proteins	SRF	1 hit	Functional Gain	Prediction:(Low)	m6A_ID_338370		0.0249737	2.39e-05	8.782e-07
rs2119342	chr3	148749621	HLTF	protein_coding	3'-UTR					5 altered motifs	7 hits	Functional Loss	Prediction:(Low)	m6A_ID_164473		0.0142478	0.454	9.115e-07
rs17499116	chr18	9275563	ANKRD12	protein_coding	synonymous			BLD		CEBPG	2 hits	Functional Gain	Prediction:(Low)	m6A_ID_316032		0.139626	0.000274	9.124e-07
rs201689715	chr5	42759230	CCDC152	protein_coding	missense		BRST					Functional Gain	Prediction:(Low)	m6A_ID_179256		0.184122	0.0208	9.76e-07
rs2713587	chr3	128290848	C3orf27	protein_coding	3'-UTR		HRT			STAT	2 hits	Functional Loss	Prediction:(Low)	m6A_ID_163084			0.338	1.058e-06
rs28675952	chr12	123199676	HCAR3	protein_coding	3'-UTR	BLD, FAT	FAT, BLD, SKIN	ESDR,SKIN		Nr2e3,PLZF	7 hits	Functional Loss	Prediction:(Low)	m6A_ID_267011		0.576171		1.096e-06
rs5756795	chr22	38122122	TRIOBP	protein_coding	missense	SKIN	IPSC, SKIN, PLCNT			BDP1,SETDB1,Znf143	12 hits	Functional Gain	Prediction:(Low)	m6A_ID_348778				1.103e-06
rs1051921	chr7	73007943	MLXIPL	protein_coding	3'-UTR			4 tissues	POL2	HNF4,NRSF	13 hits	Functional Gain	Prediction:(Low)	m6A_ID_204787		0.174858	1e-05	1.119e-06
rs419949	chr16	334890	PDIA2	protein_coding	missense	PANC	ESDR, SKIN, GI	PANC		PU.1	11 hits	Functional Gain	Prediction:(Low)	m6A_ID_289798		0.0675179	0.357	1.529e-06
rs267237	chr3	45637253	LIMD1	protein_coding	synonymous	21 tissues	11 tissues	5 tissues		Nr2f2	33 hits	Functional Gain	Prediction:(Low)	m6A_ID_157412		0.313354	0.00601	1.595e-06
rs16898012	chr8	124138855	TBC1D31	protein_coding	synonymous		BLD	BLD,SKIN		HDAC2,Pdx1	5 hits	Functional Gain	Prediction:(Low)	m6A_ID_218835				1.871e-06
rs115532219	chr3	12938762	IQSEC1	protein_coding	3'-UTR		7 tissues					Functional Gain	Prediction:(Low)	m6A_ID_155011		0.772335	0.0184	1.936e-06
rs10937148	chr3	183398071	KLHL24	protein_coding	3'-UTR				BCL3	CEBPA,CEBPB	21 hits	Functional Gain	Prediction:(Low)	m6A_ID_166000		0.141596	2.26e-14	2.219e-06
rs12219637	chr10	27225908	LINC00202-1	lincRNA			MUS			BDP1	12 hits	Functional Loss	Prediction:(Low)	m6A_ID_233318				2.243e-06
rs3825175	chr12	122079441	ORAI1	protein_coding	synonymous		6 tissues	BLD,THYM		Pbx3,Smad4	5 hits	Functional Loss	MeRIP-Seq:(Medium)	m6A_ID_32514			0.0127	2.249e-06
rs3825175	chr12	122079441	ORAI1	protein_coding	synonymous		6 tissues	BLD,THYM		Pbx3,Smad4	5 hits	Functional Loss	miCLIP&PA-m6A-Seq:(High)	m6A_ID_10054				2.249e-06
rs6855	chr2	277995	ACP1	protein_coding	3'-UTR					T3R	2 hits	Functional Loss	MeRIP-Seq:(Medium)	m6A_ID_61170		0.199043	0.108	2.258e-06
rs1060441	chr8	105264616	RIMS2	protein_coding	3'-UTR					9 altered motifs		Functional Loss	Prediction:(Low)	m6A_ID_218318	0.0153	0.0757509	0.714	2.474e-06
rs6859	chr19	45382034	PVRL2	protein_coding	3'-UTR		7 tissues	KID,LNG,PLCNT	POL2,CMYC,HAE2F1	4 altered motifs	6 hits	Functional Loss	miCLIP:(High)	m6A_ID_6531			0.0429	2.86e-06
rs4889852	chr17	78443507	NPTX1	protein_coding	3'-UTR		BRN			5 altered motifs	1 hit	Functional Loss	MeRIP-Seq:(Medium)	m6A_ID_48201		0.317843	0.144	2.912e-06
rs2976396	chr8	143764001	PSCA	protein_coding	3'-UTR	SKIN, GI, CRVX	10 tissues	SKIN,CRVX		T3R	76 hits	Functional Loss	MeRIP-Seq:(Medium)	m6A_ID_76030		0.14265	0.629	3.354e-06
rs800899	chr8	116425860	TRPS1	protein_coding	3'-UTR		BRST, STRM			YY1		Functional Loss	Prediction:(Low)	m6A_ID_218580		0.132547	0.000687	3.411e-06
rs4887783	chr16	74700743	RFWD3	protein_coding	5'-UTR	24 tissues		53 tissues	33 bound proteins	BCL,ETF	38 hits	Functional Loss	Prediction:(Low)	m6A_ID_298933		0.555297	0.267	3.447e-06
rs4887783	chr16	74700743	RFWD3	protein_coding	5'-UTR	24 tissues		53 tissues	33 bound proteins	BCL,ETF	38 hits	Functional Loss	Prediction:(Low)	m6A_ID_298926				3.447e-06
rs10760450	chr9	129459628	LMX1B	protein_coding	3'-UTR					CTCF,p300		Functional Gain	Prediction:(Low)	m6A_ID_228385		0.0276129	0.34	3.961e-06
rs11171	chr7	100486110	SRRT	protein_coding	synonymous	BLD, MUS	17 tissues	13 tissues	POL2,HEY1	HNF4		Functional Loss	miCLIP:(High)	m6A_ID_12302	0.0126	0.0587929	0.124	4.144e-06
rs1802036	chr6	32136029	AGPAT1	protein_coding	3'-UTR		7 tissues	BLD	GATA1		14 hits	Functional Gain	Prediction:(Low)	m6A_ID_191049				4.229e-06
rs2275872	chr14	62585489	LINC00643	lincRNA		BRN, PANC	BLD	ESDR,BLD,PLCNT		Hsf,NRSF		Functional Loss	Prediction:(Low)	m6A_ID_275926				4.308e-06
rs577993	chr9	79321871	PRUNE2	protein_coding	synonymous			ESDR		Hoxb8	4 hits	Functional Gain	Prediction:(Low)	m6A_ID_224519	0.0328	0.0692119	9.73e-09	4.368e-06
rs61734410	chr16	1252369	CACNA1H	protein_coding	missense					4 altered motifs	1 hit	Functional Gain	Prediction:(Low)	m6A_ID_290355		0.0421333	0.587	4.449e-06
rs61734410	chr16	1252369	CACNA1H	protein_coding	missense					4 altered motifs	1 hit	Functional Gain	Prediction:(Low)	m6A_ID_290354				4.449e-06
rs1803439	chr21	38885442	DYRK1A	protein_coding	3'-UTR		5 tissues	ESC,IPSC,BLD			1 hit	Functional Loss	Prediction:(Low)	m6A_ID_343726		0.0277474	0.335	5.245e-06
rs41264499	chr1	40090805	HEYL	protein_coding	3'-UTR		12 tissues			EBF,UF1H3BETA	2 hits	Functional Loss	MeRIP-Seq:(Medium)	m6A_ID_36999		0.00082256	0.0025	5.462e-06
rs11553326	chr4	724884	PCGF3	protein_coding	5'-UTR		ESDR, MUS			Mxi1,Myc,Sin3Ak-20	7 hits	Functional Gain	Prediction:(Low)	m6A_ID_167861		0.0125985	0.0298	5.465e-06
rs7677726	chr4	53739262	SCFD2	protein_coding	3'-UTR	ESDR, IPSC	5 tissues			BATF,CEBPB	6 hits	Functional Loss	Prediction:(Low)	m6A_ID_170931		0.132016	1.45e-07	5.505e-06
rs79163323	chr7	100346050	ZAN	polymorphic_pseudogene			LIV			NRSF,Sin3Ak-20,YY1	1 hit	Functional Gain	Prediction:(Low)	m6A_ID_206999				5.68e-06
rs79163323	chr7	100346050	ZAN	polymorphic_pseudogene			LIV			NRSF,Sin3Ak-20,YY1	1 hit	Functional Gain	Prediction:(Low)	m6A_ID_207000				5.68e-06
rs79163323	chr7	100346050	ZAN	polymorphic_pseudogene			LIV			NRSF,Sin3Ak-20,YY1	1 hit	Functional Gain	Prediction:(Low)	m6A_ID_207001				5.68e-06
rs2385404	chr2	220197388	RESP18	protein_coding	missense	4 tissues	6 tissues				10 hits	Functional Loss	Prediction:(Low)	m6A_ID_151839			0.815	5.921e-06
rs3810487	chr20	62196033	HELZ2	protein_coding	missense		IPSC	MUS,LIV		CCNT2,GR,p300	2 hits	Functional Gain	Prediction:(Low)	m6A_ID_342170				6.065e-06
rs419050	chr3	52426884	DNAH1	protein_coding	synonymous					ERalpha-a,FXR,GCNF	4 hits	Functional Gain	Prediction:(Low)	m6A_ID_159292		0.022239	0.309	6.1e-06
rs3743481	chr15	77907145	LINGO1	protein_coding	synonymous		IPSC			HNF4	1 hit	Functional Loss	MeRIP-Seq:(Medium)	m6A_ID_40704		0.00440902	0.0587	6.289e-06
rs1046097	chr17	40818699	TUBG2	protein_coding	missense				POL2	4 altered motifs	62 hits	Functional Loss	Prediction:(Low)	m6A_ID_308534		0.65179	0.603	6.41e-06
rs6138635	chr20	25658498	ZNF337-AS1	antisense			ADRL			4 altered motifs	3 hit	Functional Gain	Prediction:(Low)	m6A_ID_338160				6.445e-06
rs1042666	chr2	160626622	CD302	protein_coding	3'-UTR					ATF2,CEBPB,Foxk1	49 hits	Functional Loss	Prediction:(Low)	m6A_ID_145605			6.63e-16	6.479e-06
rs367450	chr22	20052782	TANGO2	protein_coding	3'-UTR	ESC	MUS		POL2B	HNF4	12 hits	Functional Loss	Prediction:(Low)	m6A_ID_345922				6.593e-06
rs1978	chr6	26377573	BTN3A2	protein_coding	3'-UTR					DMRT7,Hoxa7	69 hits	Functional Gain	Prediction:(Low)	m6A_ID_189647		0.0586735	0.26	6.904e-06
rs3733910	chr5	66479189	CD180	protein_coding	synonymous	BLD	11 tissues			Hic1		Functional Gain	Prediction:(Low)	m6A_ID_180054		0.246645	0.00267	7e-06
rs413985	chr6	29894603	HLA-K	pseudogene		24 tissues	ESDR, BRN, GI	30 tissues	4 bound proteins	5 altered motifs	77 hits	Functional Gain	Prediction:(Low)	m6A_ID_190074				7.035e-06
rs896210	chr2	46746745	ATP6V1E2	protein_coding	5'-UTR		9 tissues			TCF11::MafG	20 hits	Functional Loss	Prediction:(Low)	m6A_ID_138937		0.149096	0.00179	7.084e-06
rs1924105	chr13	100546789	CLYBL	protein_coding	3'-UTR		4 tissues	BLD		Evi-1,Foxm1,PPAR	1 hit	Functional Loss	Prediction:(Low)	m6A_ID_271663		0.0967035	1.55e-09	7.085e-06
rs1060915	chr17	41234470	BRCA1	protein_coding	synonymous					ERalpha-a,Mef2,Pax-2	112 hits	Functional Loss	Prediction:(Low)	m6A_ID_308804		0.044202	0.0245	7.34e-06
rs560191	chr15	43767774	TP53BP1	protein_coding	missense		OVRY			T3R	84 hits	Functional Loss	Prediction:(Low)	m6A_ID_283433		0.079452	0.00236	7.4e-06
rs560191	chr15	43767774	TP53BP1	protein_coding	missense		OVRY			T3R	84 hits	Functional Loss	Prediction:(Low)	m6A_ID_283434				7.4e-06
rs27044	chr5	96118852	ERAP1	protein_coding	missense		SKIN, GI, LNG	SKIN		Maf,NF-E2	91 hits	Functional Gain	Prediction:(Low)	m6A_ID_181934		0.00839253	0.18	7.55e-06
rs11153174	chr6	109674067	CCDC162P	pseudogene			FAT, BLD, GI	GI		Mef2,RFX5	51 hit	Functional Loss	Prediction:(Low)	m6A_ID_196427				7.695e-06
rs3743342	chr15	67485667	SMAD3	protein_coding	3'-UTR	MUS	9 tissues	6 tissues	POL2	Irf	15 hits	Functional Loss	Prediction:(Low)	m6A_ID_285992		0.121976	0.00267	7.775e-06
rs2250123	chr11	133710796	SPATA19	protein_coding	3'-UTR					ERalpha-a,GR,T3R		Functional Gain	Prediction:(Low)	m6A_ID_255601		0.0271918	0.859	7.905e-06
rs1049728	chr11	65421117	RELA	protein_coding	3'-UTR			26 tissues	6 bound proteins	4 altered motifs	5 hits	Functional Loss	miCLIP:(High)	m6A_ID_12688		0.0252665	0.426	8.24e-06
rs2615542	chr4	104066461	CENPE	protein_coding	missense		BLD			Ncx,Sox,TATA	23 hits	Functional Loss	MeRIP-Seq:(Medium)	m6A_ID_65424		0.321521	8.25e-09	8.385e-06
rs17707385	chr17	4904564	KIF1C	protein_coding	synonymous		HRT, MUS, GI			Sin3Ak-20	31 hits	Functional Loss	Prediction:(Low)	m6A_ID_302300	0.0422	0.00026621	0.202	8.392e-06
rs9935835	chr16	90161036	TUBB8P7	polymorphic_pseudogene			IPSC			Ets,SETDB1,SIX5	11 hit	Functional Gain	Prediction:(Low)	m6A_ID_301023				8.42e-06
rs3735485	chr7	45009341	MYO1G	protein_coding	missense	ESDR	6 tissues			Pax-4	11 hits	Functional Loss	Prediction:(Low)	m6A_ID_203715		0.0461847	0.838	8.455e-06
rs12445560	chr16	89661807	CPNE7	protein_coding	synonymous	ESDR	IPSC, BLD, THYM		POL2		15 hits	Functional Gain	Prediction:(Low)	m6A_ID_300709		0.0136056	0.162	8.62e-06
rs2304656	chr2	43019730	HAAO	protein_coding	5'-UTR	23 tissues	BLD	28 tissues	18 bound proteins	12 altered motifs	16 hits	Functional Gain	Prediction:(Low)	m6A_ID_138608		0.0711045	0.577	8.685e-06
rs4639	chr8	11644751	NEIL2	protein_coding	3'-UTR		4 tissues			CEBPB,Sox	22 hits	Functional Gain	Prediction:(Low)	m6A_ID_213328		0.892301	4.02e-07	8.69e-06
rs17106320	chr10	87898729	GRID1	protein_coding	synonymous		BRN			ATF3,Znf143		Functional Loss	Prediction:(Low)	m6A_ID_237182		0.0790355	0.0295	8.785e-06
rs1056720	chr20	3784110	CDC25B	protein_coding	synonymous			LNG,SKIN		PLAG1,Zfp161	3 hits	Functional Loss	Prediction:(Low)	m6A_ID_336919	0.0158	0.330804	2.84e-06	8.905e-06
rs17350674	chr9	34306410	KIF24	protein_coding	missense					HNF4	38 hits	Functional Loss	Prediction:(Low)	m6A_ID_223037		0.558189	0.526	8.975e-06
rs3096380	chr16	71319646	CMTR2	protein_coding	missense		BLD	BLD		5 altered motifs	1 hit	Functional Loss	MeRIP-Seq:(Medium)	m6A_ID_43798				9.005e-06
rs3748816	chr1	2526746	MMEL1	protein_coding	missense		SKIN				21 hits	Functional Loss	Prediction:(Low)	m6A_ID_111730	0.0278	0.383286	0.116	9.44e-06
rs689647	chr15	43762196	TP53BP1	protein_coding	missense		6 tissues	11 tissues	7 bound proteins	TCF4	121 hits	Functional Gain	Prediction:(Low)	m6A_ID_283425		0.079452	0.00236	9.599e-06
rs2276098	chr11	130777886	SNX19	protein_coding	synonymous		7 tissues			Zfx	53 hits	Functional Gain	Prediction:(Low)	m6A_ID_255542		0.0071173	0.204	9.631e-06
rs17780143	chr14	50901768	MAP4K5	protein_coding	missense		STRM, SKIN, BRN	CRVX		Mef2,SRF		Functional Loss	Prediction:(Low)	m6A_ID_274964		0.225224	0.463	9.771e-06
rs146279736	chr17	40734107	FAM134C	protein_coding	synonymous		BLD	MUS,MUS		YY1		Functional Loss	MeRIP-Seq:(Medium)	m6A_ID_46271		0.221326	0.0277	9.859e-06
rs7106771	chr11	130786308	SNX19	protein_coding	5'-UTR	24 tissues		51 tissues	28 bound proteins	ATF3,ERalpha-a,HEY1	46 hits	Functional Loss	Prediction:(Low)	m6A_ID_255552		0.0071173	0.204	1.0625e-05
rs260086	chr15	99674086	SYNM	protein_coding	3'-UTR		8 tissues	HRT			5 hits	Functional Loss	MeRIP-Seq:(Medium)	m6A_ID_41227	0.0334	0.938333	0.0525	1.082e-05
rs11558719	chr10	73972957	ASCC1	protein_coding	missense	BLD, CRVX	7 tissues					Functional Loss	Prediction:(Low)	m6A_ID_236325				1.087e-05
rs182038937	chr5	453579	EXOC3	protein_coding	synonymous		6 tissues			Hic1,NRSF		Functional Loss	MeRIP-Seq:(Medium)	m6A_ID_69301				1.1e-05
rs2235868	chr6	39040654	GLP1R	protein_coding	synonymous		ESC, IPSC			Mtf1,TR4,Zbtb3		Functional Loss	Prediction:(Low)	m6A_ID_192388	0.0187	0.00059571	0.188	1.11e-05
rs9529	chr6	41903007	CCND3	protein_coding	3'-UTR		14 tissues	MUS,BLD		4 altered motifs	7 hits	Functional Loss	Prediction:(Low)	m6A_ID_192688		0.122722	0.7	1.2345e-05
rs2236737	chr17	61938098	TCAM1P	pseudogene				GI		5 altered motifs	114 hit	Functional Gain	Prediction:(Low)	m6A_ID_311655				1.2635e-05
rs3739423	chr8	135614705	ZFAT	protein_coding	synonymous	BLD	4 tissues	PLCNT,THYM,BLD		Pax-3,Pax-5,Rad21	2 hits	Functional Loss	Prediction:(Low)	m6A_ID_219521		0.285748	2.15e-07	1.264e-05
rs2985862	chr1	2452569	PANK4	protein_coding			4 tissues	ADRL,HRT		6 altered motifs	13 hits	Functional Gain	Prediction:(Low)	m6A_ID_111691		0.535526	0.0026	1.3565e-05
rs611461	chr9	79325615	PRUNE2	protein_coding	synonymous					5 altered motifs	7 hits	Functional Gain	Prediction:(Low)	m6A_ID_224541	0.0328	0.0692119	9.73e-09	1.3625e-05
rs1065646	chr7	44809273	ZMIZ2	protein_coding	3'-UTR			15 tissues		BDP1	7 hits	Functional Loss	Prediction:(Low)	m6A_ID_203691	0.0441	0.129187	0.00281	1.422e-05
rs2043031	chr17	27085564	FAM222B	protein_coding	synonymous		5 tissues	BLD,BRST		NRSF	14 hits	Functional Loss	Prediction:(Low)	m6A_ID_305846		0.0705642		1.425e-05
rs8665	chr3	156259485	SSR3	protein_coding	3'-UTR		8 tissues				10 hits	Functional Loss	MeRIP-Seq:(Medium)	m6A_ID_63457		0.236826	0.0131	1.5305e-05
rs2515960	chr4	2951804	NOP14	protein_coding	missense		ESDR, IPSC	BLD		Nkx2,Pax-6	35 hits	Functional Loss	MeRIP-Seq:(Medium)	m6A_ID_66563		0.952026		1.65e-05
rs11555185	chr2	160604452	MARCH7	protein_coding	synonymous		HRT				24 hits	Functional Loss	miCLIP:(High)	m6A_ID_1602		0.158659		1.6505e-05
rs1045288	chr11	237087	PSMD13	protein_coding	missense			30 tissues	13 bound proteins	5 altered motifs	68 hits	Functional Loss	Prediction:(Low)	m6A_ID_241503		0.0166404	0.00398	1.6725e-05
rs1878940	chr15	73596823	NEO1	protein_coding	3'-UTR	BLD	BLD, KID, MUS			7 altered motifs	1 hit	Functional Gain	Prediction:(Low)	m6A_ID_286431		0.416137	0.0516	1.911e-05
rs1062788	chr17	61896127	DDX42	protein_coding	3'-UTR			BLD		4 altered motifs	118 hits	Functional Loss	MeRIP-Seq:(Medium)	m6A_ID_47200		0.254547	0.0688	1.9155e-05
rs2450137	chr11	77925233	USP35	protein_coding	3'-UTR		ESDR, BLD, THYM	4 tissues		NF-AT	9 hits	Functional Gain	Prediction:(Low)	m6A_ID_251547		0.979262	0.0573	1.9295e-05
rs6008598	chr22	46704243	GTSE1	protein_coding	synonymous		BRST, SKIN, HRT			HNF4	47 hits	Functional Loss	Prediction:(Low)	m6A_ID_350461		0.0490431	0.509	1.982e-05
rs3757138	chr6	26376103	BTN3A2	protein_coding	3'-UTR		ADRL			Dobox4,Irf,PU.1	57 hits	Functional Loss	miCLIP:(High)	m6A_ID_8857		0.0586735	0.26	2.0445e-05
rs1129496	chr5	115469773	COMMD10	protein_coding	synonymous		4 tissues	BRN,BRN		CTCF,Myb	1 hit	Functional Gain	Prediction:(Low)	m6A_ID_182673		0.290921	0.141	2.051e-05
rs1801052	chr17	29508775	NF1	protein_coding	synonymous	ESC				Hand1,Pou5f1,TEF	10 hits	Functional Loss	Prediction:(Low)	m6A_ID_306272		0.375154	1.17e-11	2.114e-05
rs12317704	chr12	132562291	EP400	protein_coding	3'-UTR		5 tissues			HNF4	25 hits	Functional Loss	MeRIP-Seq:(Medium)	m6A_ID_32881		0.115508	0.0267	2.206e-05
rs190271845	chr14	58955530	KIAA0586	protein_coding	missense	MUS	8 tissues	12 tissues	PU1	DMRT4,HDAC2,Irf		Functional Loss	Prediction:(Low)	m6A_ID_275637		0.144522	0.0368	2.2585e-05
rs12149862	chr16	69497203	CYB5B	protein_coding	3'-UTR		7 tissues			Foxp3,Hand1	7 hits	Functional Loss	MeRIP-Seq:(Medium)	m6A_ID_43694		0.283551	0.0046	2.2725e-05
rs11541908	chr9	35705759	TLN1	protein_coding	synonymous		ADRL, SPLN			THAP1,Zbtb3	38 hits	Functional Gain	Prediction:(Low)	m6A_ID_223369		0.0752955	2.01e-05	2.326e-05
rs6465468	chr7	95169514	ASB4	protein_coding	3'-UTR					HNF1,Mef2,Nkx2	1 hit	Functional Loss	Prediction:(Low)	m6A_ID_206161		0.0332315	0.252	2.333e-05
rs571787084	chr20	62330709	ARFRP1	protein_coding								Functional Loss	Prediction:(Low)	m6A_ID_342270				2.338e-05
rs1663564	chr12	105546172	KIAA1033	protein_coding	missense		GI	GI		Brachyury	5 hits	Functional Gain	Prediction:(Low)	m6A_ID_265010		0.127165	0.0209	2.415e-05
rs4987222	chr16	28603083	CCDC101	protein_coding	3'-UTR					5 altered motifs		Functional Gain	Prediction:(Low)	m6A_ID_294700			0.681	2.466e-05
rs6558702	chr8	2909992	CSMD1	protein_coding	missense					4 altered motifs		Functional Loss	Prediction:(Low)	m6A_ID_212577		0.418089	0.164	2.488e-05
rs17380127	chr1	160394937	VANGL2	protein_coding	synonymous						4 hits	Functional Loss	MeRIP-Seq:(Medium)	m6A_ID_29155		0.551701	0.0678	2.52e-05
rs10515	chr19	9523724	ZNF266	protein_coding	3'-UTR					Irf,Pax-5	67 hits	Functional Loss	MeRIP-Seq:(Medium)	m6A_ID_55217		0.0689519	0.461	2.58e-05
rs453098	chr6	31691657	C6orf25	protein_coding	synonymous	BLD	6 tissues			6 altered motifs	9 hits	Functional Loss	Prediction:(Low)	m6A_ID_190631		0.0492228	0.347	2.594e-05
rs1200349	chr15	41821752	RPAP1	protein_coding	synonymous		SKIN				73 hits	Functional Gain	Prediction:(Low)	m6A_ID_282595		0.745212	6.74e-09	2.654e-05
rs62344037	chr4	145659198	HHIP	protein_coding	3'-UTR					Pax-4,TCF12,TEF-1		Functional Loss	Prediction:(Low)	m6A_ID_175215		0.307433	0.0337	2.8655e-05
rs116335103	chr7	913609	SUN1	protein_coding	3'-UTR	BLD	20 tissues	12 tissues		E2F,Irf,TFIIA	1 hit	Functional Loss	Prediction:(Low)	m6A_ID_200546		0.00853515	0.0517	2.976e-05
rs4148949	chr10	73770651	CHST3	protein_coding	3'-UTR		15 tissues	MUS,OVRY			8 hits	Functional Loss	Prediction:(Low)	m6A_ID_236286		0.0337015	1.62e-09	3.0955e-05
rs117231629	chr7	100278679	GIGYF1	protein_coding	3'-UTR		11 tissues	8 tissues	POL2	6 altered motifs		Functional Loss	MeRIP-Seq:(Medium)	m6A_ID_72870		0.121034	0.0522	3.1945e-05
rs1043905	chr1	19411129	UBR4	protein_coding	synonymous					E2F,Pax-5	34 hits	Functional Gain	Prediction:(Low)	m6A_ID_114480		0.112134	0.00309	3.232e-05
rs4021	chr19	49253261	FUT1	protein_coding	3'-UTR	PANC	4 tissues	BLD		5 altered motifs	9 hits	Functional Loss	MeRIP-Seq:(Medium)	m6A_ID_53257		0.303275	0.000339	3.357e-05
rs238209	chr20	47865509	ZNFX1	protein_coding	missense		12 tissues	BLD		ERalpha-a	3 hits	Functional Loss	MeRIP-Seq:(Medium)	m6A_ID_56355		0.0517755	0.361	3.4085e-05
rs2278868	chr17	46262171	SKAP1	protein_coding	missense		IPSC, HRT, MUS	IPSC,BRN,MUS			22 hits	Functional Gain	Prediction:(Low)	m6A_ID_309830		0.195583	0.324	3.415e-05
rs3135929	chr9	34251952	UBAP1	protein_coding	3'-UTR		7 tissues	PLCNT		Smad4		Functional Loss	Prediction:(Low)	m6A_ID_223000		0.0139567	0.0102	3.46e-05
rs17646221	chr5	169310213	FAM196B	protein_coding	missense		BLD, SPLN					Functional Gain	Prediction:(Low)	m6A_ID_186879				3.467e-05
rs968719	chr17	61908271	PSMC5	protein_coding	synonymous		BLD, SKIN, PLCNT	4 tissues		Zfp187	117 hits	Functional Loss	Prediction:(Low)	m6A_ID_311644	0.044	0.20508	0.978	3.539e-05
rs61734640	chr3	52390789	DNAH1	protein_coding	missense		THYM			Ets	4 hits	Functional Gain	Prediction:(Low)	m6A_ID_159226		0.022239	0.309	3.591e-05
rs7193058	chr16	20360101	UMOD	protein_coding	synonymous	GI, BRN, PANC	9 tissues	KID,PLCNT,LIV				Functional Gain	Prediction:(Low)	m6A_ID_293618		0.333726	0.39	3.607e-05
rs11556635	chr17	4796286	MINK1	protein_coding	missense		4 tissues	BLD,BLD,LNG		Nrf1	13 hits	Functional Gain	Prediction:(Low)	m6A_ID_302170		0.019127	0.0642	3.6145e-05
rs17844775	chr4	8582234	GPR78	protein_coding	5'-UTR	5 tissues	14 tissues	10 tissues		E2F		Functional Gain	Prediction:(Low)	m6A_ID_169231		0.0155598	0.935	3.7375e-05
rs3173429	chr6	29910640	HLA-A	protein_coding	missense	24 tissues		26 tissues	CTCF,POL24H8		12 hits	Functional Gain	Prediction:(Low)	m6A_ID_190080	0.0461	0.228258	0.221	4.027e-05
rs9835659	chr3	52544470	STAB1	protein_coding	missense		ESDR					Functional Loss	Prediction:(Low)	m6A_ID_159404		0.0571029	1.24e-07	4.201e-05
rs1197683	chr15	42171537	SPTBN5	protein_coding	missense		GI, MUS			7 altered motifs		Functional Loss	Prediction:(Low)	m6A_ID_282806		0.037747	0.645	4.305e-05
rs221254	chr7	157332919	PTPRN2	protein_coding						Hsf,NRSF		Functional Loss	MeRIP-Seq:(Medium)	m6A_ID_73991		0.327806	0.247	4.34e-05
rs913659	chr20	2821144	PCED1A	protein_coding	5'-UTR	24 tissues		47 tissues	7 bound proteins	E2F		Functional Loss	MeRIP-Seq:(Medium)	m6A_ID_55617		0.814777		4.4205e-05
rs12049046	chr1	43042703	CCDC30	protein_coding	synonymous		PANC		MAFF,MAFK	Pou3f2,Sox	11 hits	Functional Loss	Prediction:(Low)	m6A_ID_117888		0.105073	0.12	4.4725e-05
rs41306199	chr1	109835163	MYBPHL	protein_coding	3'-UTR		6 tissues		ZNF263	4 altered motifs	5 hits	Functional Loss	Prediction:(Low)	m6A_ID_122216			0.385	4.492e-05
rs77201699	chr5	140683527	SLC25A2	protein_coding	5'-UTR					4 altered motifs		Functional Gain	Prediction:(Low)	m6A_ID_184833		0.49775	0.0407	4.558e-05
